# Supplementary material for: Selective killing of hepatocellular carcinoma HepG2 cells by three-dimensional nanographene nanoparticles based on triptycene
Source: Royal Society of Chemistry journal article supplement (doi:10.1039/c4nr07248k), 2015-01-01
Supplement: c4nr07248k1.pdf [file c4nr07248k1.pdf]

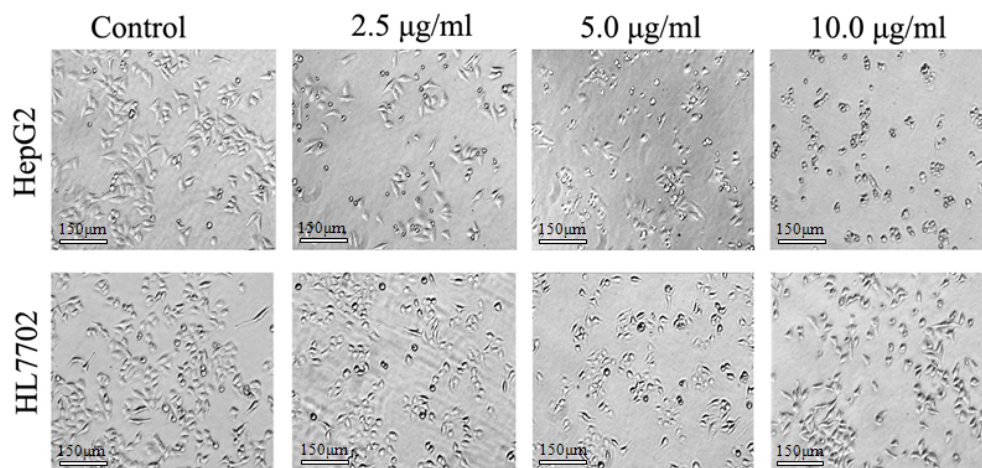

**Fig. S1** The morphological change of HepG2 cells and HL7702 cells treated with different concentrations of NG nanoparticles.

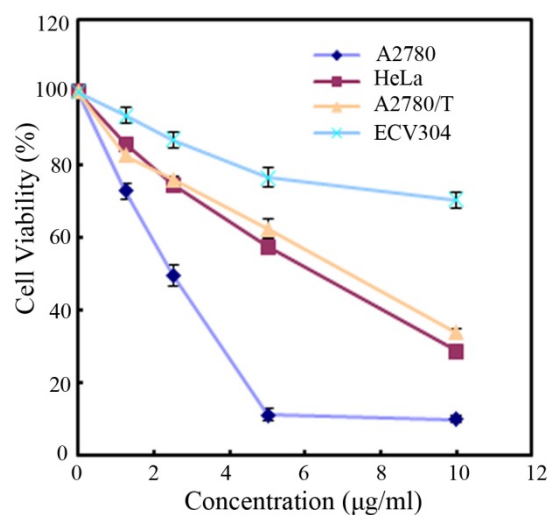

**Fig. S2.** Cell viabilities of different cells treated with different concentrations of NG nanoparticles for 24 h by MTT assay.
